# Supplementary material for: From plate to policy: segmenting consumers’ food behaviours to tailor nutritional recommendations in African cities
Source: Springer Nature journal article supplement (doi:10.1186/s40100-025-00349-7), 2025-02-25
Supplement: MOESM1 [file 40100_2025_349_MOESM1_ESM.docx]

**Supplementary Material**

This supplementary file provides a sample of the final urban consumers survey in English. The survey comprises 30 questions. Questions in blue are to be removed when delivering it in-the-household/out-of-store (shorter version of 19 questions). Q10 and Q17 are country adapted and in this example refers to what used in Kenya.

***Surveys with urban consumers (KENYA)***

**[Enumerator: avoid running the survey the day after a special day (religious festival or celebration) when an unusually varied or limited diet was eaten thus not reflecting a typical diet]**

***In the households / out-of-store, anonymous survey:***

***Nyeri; Kisumu***

**[Enumerator: before running the survey, check the following inclusion criteria: only urban consumers over 18 and responsible for food shopping within the household should take part in the survey]**

***Inclusion criteria: screening questions***

**1. Are you over 18?**

If not, thank the person for her/his time, end the interview, and get another respondent.

**2. How often do you shop for food products for your household?** (single answer)

1. Not at all – I don't take care of it personally
2. From time to time – I do sometimes shop for food
3. Around half of the time – both I and others in my household shop for food
4. Most of the time – sometimes another household member does the food shopping
5. Always – I do all the food shopping for my household

If the criterion is met (from 3. to 5.), run the interview, otherwise get another respondent.

***In-lab experiments and survey:***

***Kitui***

**[Enumerator: before inviting the person, check the following inclusion criteria: only urban consumers over 18, responsible for food shopping within the household, and literate should be invited to take part in the activity]**

***Inclusion criteria: screening questions***

1. **Are you over 18?**

If not, thank the person for her/his time, end the interview, and get another respondent.

1. **How often do you shop for food products for your household?** (single answer)
2. Not at all – I don't take care of it personally
3. From time to time – I do sometimes shop for food
4. Around half of the time – both I and others in my household shop for food
5. Most of the time – sometimes another household member does the food shopping
6. Always – I do all the food shopping for my household

If the criterion is not met (1. or 2.), thank the person for her/his time, end the interview, and get another respondent.

1. **Please read the following:** “*Please tell me the name of one of the last food items you bought*”

If the criterion is met (the person can read), invite the person to the university lab and deliver the invitation.

**Survey**

**Urban Consumers**

| **Before you start, please consider this!**    *This questionnaire**does not require your name or any information with which you could be identified.*  ***Filling in the questionnaire is voluntary*** *- if you wish not to answer some of the questions, please, leave it blank!*    *This questionnaire is not a test –* ***there are no good or bad answers****.*    *Please* ***answer honestly and carefully***  *We are grateful for your help.* |
| --- |

**ID code** [ _____________ ]

**Your food choices**

**Purchasing food products for your household**

1. **Where do you usually obtain/buy the following categories of food products?** Tick the main sources with √ (leave blank if the food product is not produced or purchased)

| **Product** | Produced in my household | Donated / produced by other households | Bought from crop or fish farm / Street vendor /  Wet market | Bought from Village shop /  Grocery stores | Bought from supermarkets |
| --- | --- | --- | --- | --- | --- |
| Cereals or cereal products |  |  |  |  |  |
| Vegetables |  |  |  |  |  |
| Fruits |  |  |  |  |  |
| Legumes |  |  |  |  |  |
| Fish |  |  |  |  |  |
| Oils |  |  |  |  |  |

1. **When you decide what food product you are going to buy, how important are the following reasons?**

Rate your opinion using the following 1-5 scale (from 1: **not at all important**; to 5: **extremely**  **important**). Tick √ the chosen answers.

| **Reason** | 1 | 2 | 3 | 4 | 5 |
| --- | --- | --- | --- | --- | --- |
| Availability |  |  |  |  |  |
| Nutrition content (healthiness) |  |  |  |  |  |
| Wishing to be a “good” provider (parent, host) |  |  |  |  |  |
| Affordability (price) |  |  |  |  |  |
| Environmental friendliness |  |  |  |  |  |
| Aiming at diversifying / balancing the diet |  |  |  |  |  |
| Linkage with our tradition / culture |  |  |  |  |  |
| Locally produced |  |  |  |  |  |
| Product characteristics (taste, aroma, color, shape) |  |  |  |  |  |

1. **What share of your household income is spent on purchased food?** Tick √ the chosen answer

A very limited part (less than 25%)

Less than half (from 25% to 50%)

About half (50%)

More than half (from 50% to 75%)

Almost all (from 75% to 100%)

1. **Which of the following food products is lacking in your household diet?**

Rate your opinion using the following 1-5 scale (from 1: **completely lacking**; to 5: **extremely present**).Tick √ the chosen answers.

| **Product** | 1 | 2 | 3 | 4 | 5 |
| --- | --- | --- | --- | --- | --- |
| Cereals or cereal products |  |  |  |  |  |
| Vegetables |  |  |  |  |  |
| Fruits |  |  |  |  |  |
| Legumes |  |  |  |  |  |
| Fish |  |  |  |  |  |
| Oils |  |  |  |  |  |

1. **How often do you buy local food products? (foods or ingredients only produced within a short distance)**

Rate your opinion using the following 1-5 scale (from 1: **Never**; to 5: **Always (most of the time**). Tick √ the chosen answer.

| 1 | 2 | 3 | 4 | 5 |
| --- | --- | --- | --- | --- |
|  |  |  |  |  |

1. **If you were given the option to include in your household diet a new local food product (foods or ingredients only produced within a short distance), to what extent would you be interested in buying this new local food product?**

Rate your opinion using the following 1-5 scale (from 1: **not at all interested**; to 5: **extremelyinterested**).Tick √ the chosen answer.

| 1 | 2 | 3 | 4 | 5 |
| --- | --- | --- | --- | --- |
|  |  |  |  |  |

1. **How likely would each of the following reasons make you include this new local food product in your household diet?**

Rate your opinion using the following 1-5 scale (from 1: **Very unlikely**; to 5: **Very likely**).Tick √ the chosen answers.

| **Reason** | 1 | 2 | 3 | 4 | 5 |
| --- | --- | --- | --- | --- | --- |
| It would be environmentally-friendly |  |  |  |  |  |
| I could afford it |  |  |  |  |  |
| I could easily find it where I buy food |  |  |  |  |  |
| It would be in line with my culture / tradition |  |  |  |  |  |
| It could help local farmers |  |  |  |  |  |
| It has been suggested by friends / people I trust |  |  |  |  |  |

1. **How likely would each of the following obstacles prevent you from including this new local food product in your household diet?**

Rate your opinion using the following 1-5 scale (from 1: **Very unlikely**; to 5: **Very likely**).Tick √ the chosen answers.

| **Obstacle** | 1 | 2 | 3 | 4 | 5 |
| --- | --- | --- | --- | --- | --- |
| I would not be familiar with its taste |  |  |  |  |  |
| I don’t want to change my food practice/habits |  |  |  |  |  |
| I would need to compare its price with other food products |  |  |  |  |  |
| I don’t know if it is healthy |  |  |  |  |  |
| My friends / people I know do not eat it |  |  |  |  |  |
| I don’t trust the farmer / seller |  |  |  |  |  |

**Eating habits within your household**

1. **Was yesterday a celebration or feast or fasting day in which you ate special food products or in which you ate more, or less than usual?**

Yes No

**[Enumerator in Nyeri or Kisumu (in the households / out-of-store survey): please read the following text exactly as it is written to the interviewee and make sure the interviewee has understood the provided guidelines.**

**Ensure that you read to the interviewee the list of foods and drinks provided and tick the corresponding boxes of those classes corresponding to food/drinks eaten or drunk by the interviewee.]**

1. **Now we would like to ask you some yes-or-no questions about foods and drinks that you consumed yesterday during the day or night, whether you had it at home or somewhere else.**

First, we would like you to think about yesterday, from the time you woke up through the night.

Think to yourself about the first thing you ate or drank after you woke up in the morning … Think about where you were when you had any food or drink in the middle of the day … Think about where you were when you had any evening meal … and any food or drink you may have had in the evening or late-night... and any other snacks or drinks you may have had between meals throughout the day or night.

We are interested in whether you had the food items mentioned below even if they were combined with other foods.

**[Nyeri or Kisumu: for the households / out-of-store survey only]**

**Please listen to the list of foods and drinks, and if you ate or drank ANY ONE OF THEM, say yes.**

**[Kitui: for the in-lab survey only]**

**Please have a look to the list of foods and drinks, and if you ate or drank ANY ONE OF THEM,** **tick YES, otherwise NO.** Leave blank if you don’t know/prefer not to answer

| **ID** |  | **Eaten or Drunk? (Yes-No)** |
| --- | --- | --- |
|  | **Yesterday, did you eat any of the following foods?** | |
| **10.01** | Maize ugali , maize porridge, rice, bread, chapati, pasta, or noodles? |  |
| **10.02** | Ugali made from millet or sorghum, porridge made from millet or sorghum, green maize, githeri, oats, or popcorn? |  |
| **10.03** | Irish potato, white sweet potato, green banana, arrowroot, yam, or cassava? |  |
| **10.04** | Beans, githeri, green gram, black gram, green lentils, pigeon peas, or chickpeas? |  |
|  | **Yesterday, did you eat any of the following vegetables?** | |
| **10.05** | Carrots, pumpkin, butternut, sweet potato that is orange inside, or red capsicum? |  |
| **10.6.1** | Sukuma wiki, spinach, nightshade leaves, amaranth leaves, African spider plant, or cowpea leaves? |  |
| **10.06.2** | Jute mallow, pumpkin leaves, malabar spinach, mitoo,  broccoli or Ethiopian kale? |  |
| **10.07.1** | Tomatoes, cabbage, green capsicum, mushrooms, or cauliflower? |  |
| **10.07.2** | Cucumber, French beans, lettuce, eggplant, or okra? |  |
|  | **Yesterday, did you eat any of the following fruits?** | |
| **10.08** | Ripe pawpaw, ripe mango, or passionfruit? |  |
| **10.09** | Orange, tangerine, or grapefruit? |  |
| **10.10.1** | Banana, pineapple, avocado, or watermelon? |  |
| **10.10.2** | Apple, pear, grapes, or guava? |  |
|  | **Yesterday, did you eat any of the following sweets?** | |
| **10.11** | Cakes, cupcakes, or sweet biscuits? |  |
| **10.12** | Candy, chocolates, ice cream, or ice lollies? |  |
|  | **Yesterday, did you eat any of the following foods of animal origin?** | |
| **10.13** | Eggs? |  |
| **10.14** | Cheese? |  |
| **10.15** | Yogurt or mala? |  |
| **10.16** | Sausages, Smokies, hot dogs, salami, or ham? |  |
| **10.17** | Goat, beef, minced beef, offal, mutton, or wild game? |  |
| **10.18** | Pork, rabbit, or camel? |  |
| **10.19** | Chicken, duck, turkey, quail, guinea fowl, or wild birds? |  |
| **10.20** | Fish, dagaa, canned tuna, or seafood? |  |
|  | **Yesterday, did you eat any of the following other foods?** | |
| **10.21** | Groundnuts, cashews, pumpkin seeds, sesame seeds, or peanut butter? |  |
| **10.22** | Crisps, Ringoz, Chooze, or Chevda? |  |
| **10.23** | Indomie? |  |
| **10.24** | Chips, ngumu, mandaazi, samosa, fried chicken, or bhajias? |  |
|  | **Yesterday, did you have any of the following beverages?** | |
| **10.25** | Milk, tea with milk, or powdered milk? |  |
| **10.26** | Tea with sugar, coffee with sugar, Milo or cocoa? |  |
| **10.27** | Fruit juice or fruit drinks? |  |
| **10.28** | Soft drinks such as Coca-Cola, Fanta, or Sprite, or energy drinks? |  |
|  | **Yesterday, did you get food from any place like...** | |
| **10.29** | Kenchic, KFC, Burger King, Chicken Inn, Subway, Pizza Hut, or other places that serve pizza or burgers? |  |

1. **According to this definition: “A healthy diet is one that provides adequacy of nutrients, without health-harming substances and excess of nutrients”, do you consider your household diet as healthy?**

Rate your opinion using the following 1-5 scale (from 1: **No, totally unhealthy**; to 5: **Yes, totally healthy**).Tick √ the chosen answer.

| 1 | 2 | 3 | 4 | 5 |
| --- | --- | --- | --- | --- |
|  |  |  |  |  |

1. **[Block 1] Think about a new food product – such as a new iron-fortified flour – that can reduce the likelihood of having an infection. What would you choose between:** Tick √ the chosen answer

| **A. not including the new blended flour in your diet that implies for you:**   - **no additional food costs and** - **60% of probability of getting an infection at the end of next year.** | **B. including the new blended flour in your diet that implies for you:**   - **some additional food cost now and** - **40% of probability of getting an infection at the end of next year.** |
| --- | --- |

**[Block 2] Think about a new food product – such as a new iron-fortified flour – that is likely to reinforce your immunity to infections. What would you choose between:** Tick √ the chosen answer

| **A. not including the new blended flour in your diet that implies for you:**   - **no additional food costs and** - **40% of probability of being protected from an infection at the end of next year.** | **B. including the new blended flour in your diet that implies for you:**   - **some additional food cost now and** - **60% of probability of being protected from an infection at the end of next year.** |
| --- | --- |

1. **If you were given the option to include in your household diet a new food product with augmented nutrient content (e.g., naturally improved bean with high levels of proteins and minerals) that could complement your current household diet, to what extent would you be interested in buying this new nutrient-dense food product?**

Rate your opinion using the following 1-5 scale (from 1: **Not at all interested**; to 5: **Extremely interested**).Tick √ the chosen answer.

| 1 | 2 | 3 | 4 | 5 |
| --- | --- | --- | --- | --- |
|  |  |  |  |  |

1. **How likely would each of the following reasons make you include this new nutrient-dense food product in your household diet?**

Rate your opinion using the following 1-5 scale (from 1: **Very unlikely**; to 5: **Very likely**).

Tick √ the chosen answers.

| **Reason** | 1 | 2 | 3 | 4 | 5 |
| --- | --- | --- | --- | --- | --- |
| It could make my household diet healthier |  |  |  |  |  |
| It could enhance my social status |  |  |  |  |  |
| I could afford it |  |  |  |  |  |
| It would be in line with my lifestyle / culture |  |  |  |  |  |
| I trust the farmer / seller |  |  |  |  |  |
| I would trust my doctor’s recommendation |  |  |  |  |  |

1. **How likely would each of the following obstacles prevent you from including this new nutrient-dense food product in your household diet?**

Rate your opinion using the following 1-5 scale (from 1: **Very unlikely**; to 5: **Very likely**).

Tick √ the chosen answers.

| **Obstacle** | 1 | 2 | 3 | 4 | 5 |
| --- | --- | --- | --- | --- | --- |
| A new food product would make me feel less safe |  |  |  |  |  |
| I would not be familiar with its taste |  |  |  |  |  |
| I don’t want to change my food practice/habits |  |  |  |  |  |
| I would need to compare its price with other food products |  |  |  |  |  |
| I would not have enough time to prepare it |  |  |  |  |  |
| My friends / people I know do not eat it |  |  |  |  |  |

1. **Were you and your household able to meet your food needs during the last year?** Tick √ the chosen answer

| No, we experienced serious food shortages | We experienced some difficulties | We had about what we needed | Yes, we had what we needed | Yes, more than enough |
| --- | --- | --- | --- | --- |
|  |  |  |  |  |

**[Enumerator in Nyeri or Kisumu (in the households / out-of-store survey): please read the following text exactly as it is written to the interviewee and make sure the interviewee has understood the provided guidelines.**

**Ensure that you read to the interviewee the list of foods/drinks provided and tick the corresponding boxes of those classes corresponding to food/drink eaten/drunk by the interviewee.]**

1. **Please select all the food product categories that ANY member of your household consumed yesterday during the day or night, in the household. Please exclude food products purchased AND eaten outside the home.**

Tick with **YES** the categories with food/drink eaten/drunk by your household yesterday, and **NO** otherwise. Leave blank if you don’t know/prefer not to answer.

| **ID** | **Food product categories** | **Eaten or Drunk? (Yes-No)** |
| --- | --- | --- |
| **17.01** | **Cereals**: Maize ugali , maize porridge, rice, bread, chapati, pasta, or noodles?  Ugali made from mille, cassava or sorghum, porridge made from millet, cassava, soyabean or sorghum, green maize, githeri, oats, or popcorn? Pan cakes or indomie? |  |
| **17.02** | **White roots and tubers**: Irish potato, white sweet potato, green banana, arrowroot, yam, or cassava? |  |
| **17.03** | **Orange fleshed roots/tubers or vegetables:** Carrots, pumpkin, butternut, sweet potato that is orange inside, malenge,or red capsicum? |  |
| **17.04** | **Dark green leafy vegetables**:Sukuma wiki, spinach, nightshade leaves, amaranth leaves, African spider plant, or cowpea leaves? Jute mallow, pumpkin leaves, malabar spinach, mitoo, or broccoli? African spinach, or Ethiopian Kale? |  |
| **17.05** | **Other vegetables**: Tomatoes, cabbage, green capsicum, mushrooms, or cauliflower?  Cucumber, French beans, lettuce, eggplant, or okra? Leeks, asparagus? |  |
| **17.06** | **Orange fleshed fruits**: Ripe pawpaw, ripe mango, or passionfruit? |  |
| **17.07** | **Other fruits**: Other fruits like orange,lemon, linme,  tangerine, or grapefruit? Banana, pineapple, avocado, or watermelon?  Apple, pear, grapes, or guava?  Tomato fruit, tarmarillo, tamarind, pomegranate or thorn melon? |  |
| **17.08** | **Organ meat**: Offal |  |
| **17.09** | **Flesh meat**:Sausages, Smokies, bacon, hot dogs, salami, mutura or ham?Goat, beef, minced beef,  mutton, or wild game?Pork, rabbit, or camel? Chicken, duck, turkey, quail, guinea fowl, quail, or wild birds? |  |
| **17.1** | **Eggs**: Eggs from any kind of birds |  |
| **17.11** | **Fish**: Fish, dagaa, canned tuna, or seafood? |  |
| **17.12** | **Pulses**: Beans, githeri, green gram, black gram, green lentils, pigeon peas, cowpeas lentils or chickpeas? |  |
| **17.13** | **Nuts and seeds**: Groundnuts, cashews, pumpkin seeds, sesame seeds, or peanut butter? |  |
| **17.14** | **Milk and milk-products**: Milk, tea with milk, or powdered milk? Cheese?  Yogurt or mala? |  |
| **17.15** | **Oils/Fats**: Animal/fish fat, butter, simsim/groundnout oil, margarine, sunflower oil or vegetables oil. |  |
| **17.16** | **Sugar and sweets**: Cakes, cupcakes, or sweet biscuits? Candy, chocolates, ice cream, or ice lollies? Tea with sugar, coffee with sugar, Milo or cocoa? Soft drinks such as Coca-Cola, Fanta, Krest, Stoney, or Sprite, or energy drinks? |  |
| **17.17** | **Spices and Condiments**:   salt, seasalt, curry, ginger, garlic, green pepper, tropical onion, corriander, or rosemary? pepper, coriander, parsley or pili pili hoho?? Ash lye extracted from legues? Coconut and pawpaw extracts?fish powder, tomato paste, flavor cubes such as royco, knorr? |  |
| **17.18** | **Beverages:**coffee, tea, drinking chocolate, or cocoa drink and alcoholic beverages? |  |

**About you and your household**

1. **Please indicate your:**

18.1 Age: _________

18.2 Gender: Male Female Prefer not to say

18.3 Education level:

**[Enumerator (in the households / out-of-store survey): if the respondent is illiterate tick this box ]**

= no qualification, literate;

= primary;

= secondary;

= more than secondary;

= other

18.4 Role in the household:

= parent;

= daughter / son;

= relative (grandmother, grandfather, aunt, uncle, …)

= other (e.g., housemaid, …)

**[Enumerator: if relevant please provide options (closed ended); if not relevant go to the next question]**

18.5 Tribe/Ethnic group: _____________

_____________

**[Enumerator: Household members are people present and include: (1) Head and his/her partner; (2) All of their unmarried children; (3) Their married children who are currently living and eating together; (4) Other relatives and non-relatives living and eating together for over 3 months.]**

1. **About your household, please indicate the:**

19.1 No. of household members (adults 14 or older): _________

19.2 No. of children (aged 3-13 years): _________

19.3 No. of children (aged 0-2 years): _________

19.4 No. of household members with salary/revenue: _________

1. **Please indicate the household head’s form of employment.** Tick √ the chosen answer

| **Form of employment** | |
| --- | --- |
| Unemployed |  |
| Regular worker |  |
| Casual worker (paid by the day) |  |
| Clerk (formal employment) |  |
| Manager |  |
| Businessman / self-employed |  |
| Sole trader |  |
| Other |  |

**[Enumerator: please adapt the following classes according to the local average income in local currency (LC)]**

1. **What is your average monthly household income from all sources (in-kind income included**

| Less than … (LC) | From … to … (LC) | From … to … (LC) | From … to … (LC) | Greater than … (LC) |
| --- | --- | --- | --- | --- |
|  |  |  |  |  |

1. **Did you or your wife/husband immigrate from another area?**

Yes No

1. **Did any of your household members emigrate to another area (in the same country or in a different country) in search for a job?** Tick √ the chosen answer

Yes No → Go to question 25.

1. **If they send you money, to what extent do those remittances contribute to your family welfare?**

Rate your opinion using the following 1-5 scale (from 1: **Not at all important**; to 5: **Extremely important**).Tick √ the chosen answer.

| 1 | 2 | 3 | 4 | 5 |
| --- | --- | --- | --- | --- |
|  |  |  |  |  |

1. **Did you experience any of the following setbacks during the last year? If so, how impactful were they?**

Rate your opinion using the following 1-5 scale (from 1: **Not at all impactful**; to 5: **Extemely impactful**).Tick √ the chosen answers.

| **Troubles** | 1 | 2 | 3 | 4 | 5 |
| --- | --- | --- | --- | --- | --- |
| Food shortage/starvation |  |  |  |  |  |
| Health (disease) |  |  |  |  |  |
| Drinking water shortage |  |  |  |  |  |
| Climatic event (flood, drought, storm) |  |  |  |  |  |
| Loss of home |  |  |  |  |  |
| Increase of food prices |  |  |  |  |  |
| Loss of job |  |  |  |  |  |
| Income reduction |  |  |  |  |  |
| Social problems (violence or crime) |  |  |  |  |  |

1. **Thinking about your near future, do you consider yourself and your household at risk of the following? If so, how important do you consider the risk to be?**

Rate your opinion using the following 1-5 scale (from 1: **Not at all important**; to 5: **Extremely important**).Tick √ the chosen answers.

| **Reasons** | 1 | 2 | 3 | 4 | 5 |
| --- | --- | --- | --- | --- | --- |
| Food shortage/starvation |  |  |  |  |  |
| Health (disease) |  |  |  |  |  |
| Drinking water shortage |  |  |  |  |  |
| Climatic event (flood, drought, storm) |  |  |  |  |  |
| Loss of home |  |  |  |  |  |
| Increase of food prices |  |  |  |  |  |
| Loss of job |  |  |  |  |  |
| Income reduction |  |  |  |  |  |
| Social problems (violence or crime) |  |  |  |  |  |

1. **To what extent do you feel attached to your local territory (your city and its surroundings)?**

Rate your opinion using the following 1-5 scale (from 1: **Not at all attached**; to 5: **Extremely attached**).Tick √ the chosen answer.

| 1 | 2 | 3 | 4 | 5 |
| --- | --- | --- | --- | --- |
|  |  |  |  |  |

1. **To what extent do you feel attached to your peers (your local community)?**

Rate your opinion using the following 1-5 scale (from 1: **Not at all attached**; to 5: **Extremely attached**).Tick √ the chosen answer.

| 1 | 2 | 3 | 4 | 5 |
| --- | --- | --- | --- | --- |
|  |  |  |  |  |

1. **Generally speaking, would you say that most people can be trusted or that you can’t be too careful in dealing with them?** Tick √ the chosen answer

Most people can be trusted

It depends

One cannot be too careful

1. **How much do you trust …:**

Rate your opinion using the following 1-5 scale (from 1: **No trust at all**; to 5: **A lot of trust**).

Tick √ the chosen answers.

|  | 1 | 2 | 3 | 4 | 5 |
| --- | --- | --- | --- | --- | --- |
| …public authorities |  |  |  |  |  |
| …your community (neighbours in the district) |  |  |  |  |  |
| …consumers’ associations/organizations |  |  |  |  |  |
| …farmers |  |  |  |  |  |
| …food processors |  |  |  |  |  |
| …food street vendors |  |  |  |  |  |
| …food vendors in the market or small grocery storers |  |  |  |  |  |
| …food vendors in the supermarket |  |  |  |  |  |

The questionnaire is complete. Thank you very much for your collaboration!
